# Supplementary material for: Tissue Response to Deep Brain Stimulation and Microlesion: A Comparative Study
Source: PubMed Central journal article supplement — Neuromodulation. 2016 Mar 28;19(5):451–8. doi: 10.1111/ner.12406 (PMC4961567; doi:10.1111/ner.12406), 2016-03-28

Lesion animal:  
**MCM2** immunolabeling

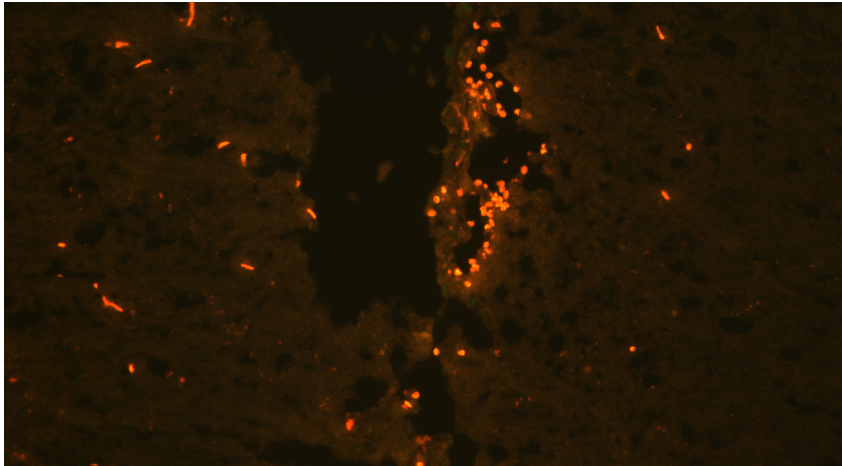

Lesion animal: **Ki67/Iba1** immunolabeling

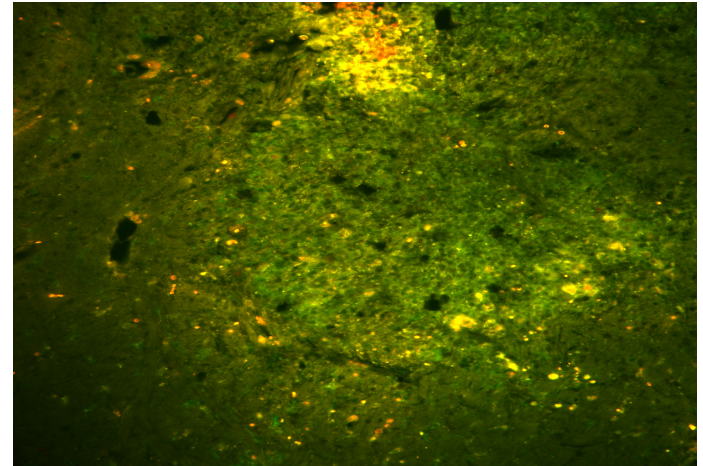

Sham animal:  
**MCM2** immunolabeling

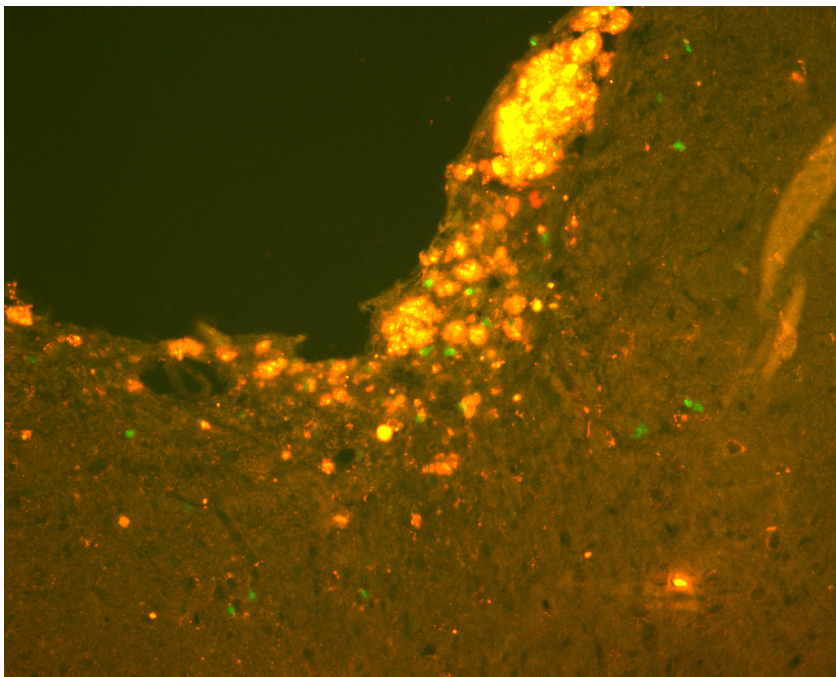

Sham animal: **Ki67/Iba1** immunolabeling

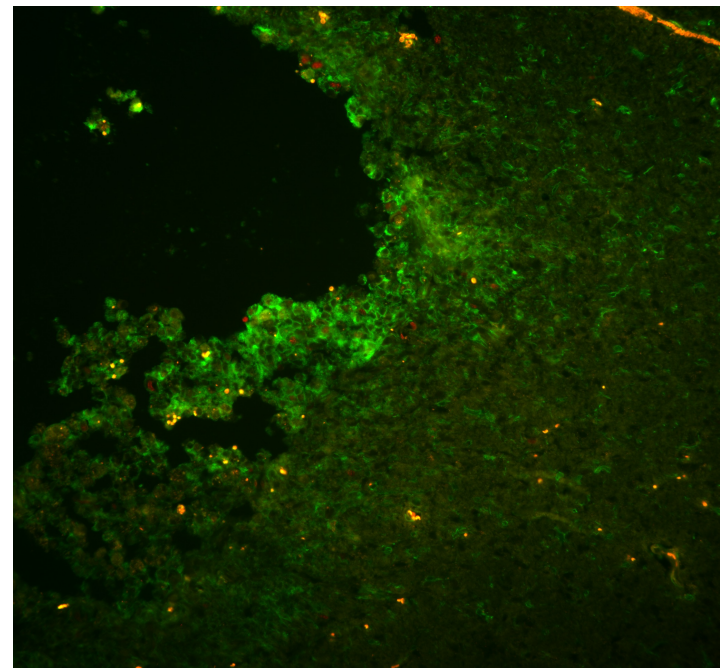

Supplement: NIHMS767880-supplement-Supp_Fig_S1.pdf [file NIHMS767880-supplement-Supp_Fig_S1.pdf]
